# Supplementary material for: Effects of abasic sites on structural, thermodynamic and kinetic properties of quadruplex structures
Source: PubMed Central journal article supplement — Nucleic Acids Res. 2009 Dec 21;38(6):2069–80. doi: 10.1093/nar/gkp1087 (PMC2847214; doi:10.1093/nar/gkp1087), 2009-12-21
Supplement: gkp1087_1.pdf [file gkp1087_1.pdf]

## SUPPORTING MATERIAL

### NMR spectroscopy

<sup>1</sup>H-NMR resonances values of ODNs **AQ1-AQ5** (500 MHz, T = 25°C). N.D. = not determined.

| <b>AQ1 d(T<sub>1</sub>S<sub>2</sub>G<sub>3</sub>G<sub>4</sub>G<sub>5</sub>G<sub>6</sub>T<sub>7</sub>)</b> |       |      |           |      |      |           |                 |       |
|-----------------------------------------------------------------------------------------------------------|-------|------|-----------|------|------|-----------|-----------------|-------|
|                                                                                                           | H8/H6 | H1'  | H2'/H2''  | H3'  | H4'  | H5'/H5''  | CH <sub>3</sub> | NH    |
| T <sub>1</sub>                                                                                            | 7.39  | 5.88 | 2.08/2.34 | N.D. | N.D. | N.D.      | 1.60            | N.D.  |
| G <sub>3</sub>                                                                                            | 7.98  | 6.08 | 2.65/2.94 | 4.96 | 4.41 | 4.08      | -               | 11.67 |
|                                                                                                           | 8.04  | 6.09 | 2.69/2.96 | 4.99 | 4.40 | 4.09      | -               | 11.70 |
| G <sub>4</sub>                                                                                            | 7.76  | 6.13 | 2.61/2.87 | 5.06 | 4.52 | 4.27      | -               | 11.18 |
| G <sub>5</sub>                                                                                            | 7.79  | 6.06 | 2.71/2.78 | 5.08 | 4.54 | 4.34      | -               | 11.02 |
| G <sub>6</sub>                                                                                            | 7.67  | 6.22 | 2.55/2.65 | 4.95 | 4.48 | 4.26/4.18 | -               | 10.94 |
| T <sub>7</sub>                                                                                            | 7.29  | 6.03 | 2.13      | 4.45 | 4.01 | N.D.      | 1.62            | N.D.  |

| <b>AQ2 d(T<sub>1</sub>G<sub>2</sub>S<sub>3</sub>G<sub>4</sub>G<sub>5</sub>G<sub>6</sub>T<sub>7</sub>)</b> |       |      |           |      |      |          |                 |       |
|-----------------------------------------------------------------------------------------------------------|-------|------|-----------|------|------|----------|-----------------|-------|
|                                                                                                           | H8/H6 | H1'  | H2'/H2''  | H3'  | H4'  | H5'/H5'' | CH <sub>3</sub> | NH    |
| T <sub>1</sub>                                                                                            | 7.24  | 5.81 | 1.86/2.17 | 4.52 | 3.88 | 3.49     | 1.35            | N.D.  |
| G <sub>2</sub>                                                                                            | 7.95  | 6.17 | 2.87/2.99 | 5.01 | 3.95 | N.D.     | -               | 11.46 |
| G <sub>4</sub>                                                                                            | 7.45  | 6.14 | 2.56/2.86 | 4.85 | 4.23 | 3.93     | -               | 11.29 |
| G <sub>5</sub>                                                                                            | 7.87  | 6.11 | 2.61/2.82 | 5.03 | 4.31 | N.D.     | -               | 11.23 |
| G <sub>6</sub>                                                                                            | 7.64  | 6.21 | 2.51/2.64 | 4.93 | 4.23 | N.D.     | -               | 11.13 |
| T <sub>7</sub>                                                                                            | 7.32  | 6.03 | 2.14      | 4.45 | 4.01 | N.D.     | 1.63            | N.D.  |

| <b>AQ3 d(T<sub>1</sub>G<sub>2</sub>G<sub>3</sub>S<sub>4</sub>G<sub>5</sub>G<sub>6</sub>T<sub>7</sub>)</b> |       |      |           |      |      |           |                 |       |
|-----------------------------------------------------------------------------------------------------------|-------|------|-----------|------|------|-----------|-----------------|-------|
|                                                                                                           | H8/H6 | H1'  | H2'/H2''  | H3'  | H4'  | H5'/H5''  | CH <sub>3</sub> | NH    |
| T <sub>1</sub>                                                                                            | 7.34  | 6.08 | 2.18/2.64 | 4.97 | 4.51 | 4.03/4.20 | 1.64            | N.D.  |
| G <sub>2</sub>                                                                                            | 8.02  | 5.95 | 2.88/2.64 | 5.13 | 4.95 | 4.02/4.20 | -               | 11.44 |
| G <sub>3</sub>                                                                                            | 7.53  | 6.15 | 2.47/2.63 | 4.98 | 4.45 | N.D.      | -               | 11.22 |
| G <sub>5</sub>                                                                                            | 8.09  | 6.13 | 2.83/2.99 | 5.01 | 4.36 | 4.00      | -               | 10.90 |
| G <sub>6</sub>                                                                                            | 7.25  | 6.28 | 2.47/2.90 | 4.93 | 4.27 | 4.18      | -               | 11.60 |
| T <sub>7</sub>                                                                                            | 7.32  | 5.89 | 2.03/2.30 | 4.85 | 4.65 | 4.07/4.18 | 1.42            | N.D.  |

| <b>AQ4 d(T<sub>1</sub>G<sub>2</sub>G<sub>3</sub>G<sub>4</sub>S<sub>5</sub>G<sub>6</sub>T<sub>7</sub>)</b> |       |      |           |      |      |          |                 |      |
|-----------------------------------------------------------------------------------------------------------|-------|------|-----------|------|------|----------|-----------------|------|
|                                                                                                           | H8/H6 | H1'  | H2'/H2''  | H3'  | H4'  | H5'/H5'' | CH <sub>3</sub> | NH   |
| T <sub>1</sub>                                                                                            | 7.46  | 5.94 | 2.18/2.46 | N.D. | N.D. | N.D.     | 1.44            | N.D. |
| G <sub>2</sub>                                                                                            | 8.11  | 6.10 | 2.73/3.06 | 5.04 | 4.08 | N.D.     | -               | N.D. |
| G <sub>3</sub>                                                                                            | 7.77  | 6.04 | 2.53/2.78 | 5.06 | N.D. | N.D.     | -               | N.D. |
| G <sub>4</sub>                                                                                            | 7.88  | 6.12 | 2.66      | 5.08 | N.D. | N.D.     | -               | N.D. |
| G <sub>6</sub>                                                                                            | 7.64  | 5.88 | 2.20/2.49 | N.D. | N.D. | N.D.     | -               | N.D. |
| T <sub>7</sub>                                                                                            | 7.36  | 5.98 | 2.15      | N.D. | N.D. | N.D.     | 1.52            | N.D. |

| <b>AQ5 d(T<sub>1</sub>G<sub>2</sub>G<sub>3</sub>G<sub>4</sub>G<sub>5</sub>S<sub>6</sub>T<sub>7</sub>)</b> |       |      |           |      |      |           |                 |      |
|-----------------------------------------------------------------------------------------------------------|-------|------|-----------|------|------|-----------|-----------------|------|
|                                                                                                           | H8/H6 | H1'  | H2'/H2''  | H3'  | H4'  | H5'/H5''  | CH <sub>3</sub> | NH   |
| T <sub>1</sub>                                                                                            | 7.37  | 5.86 | 2.12/2.38 | 4.61 | 3.66 | 3.19      | 1.38            | N.D. |
| G <sub>2</sub>                                                                                            | 8.01  | 5.98 | 2.63/2.93 | 4.96 | 4.38 | 3.99      | -               | N.D. |
| G <sub>3</sub>                                                                                            | 7.70  | 6.00 | 2.52/2.78 | 4.99 | 4.46 | 4.30/4.22 | -               | N.D. |
| G <sub>4</sub>                                                                                            | 7.65  | 6.17 | 2.43/2.53 | 4.89 | 4.42 | 4.19/4.09 | -               | N.D. |
| G <sub>5</sub>                                                                                            | 7.60  | 5.92 | 2.63/2.72 | 5.01 | 4.46 | 3.74      | -               | N.D. |
| T <sub>7</sub>                                                                                            | 7.28  | 5.80 | 1.90/2.00 | 4.25 | 3.83 | N.D.      | 1.52            | N.D. |

## Polyacrylamide Gel Electrophoresis

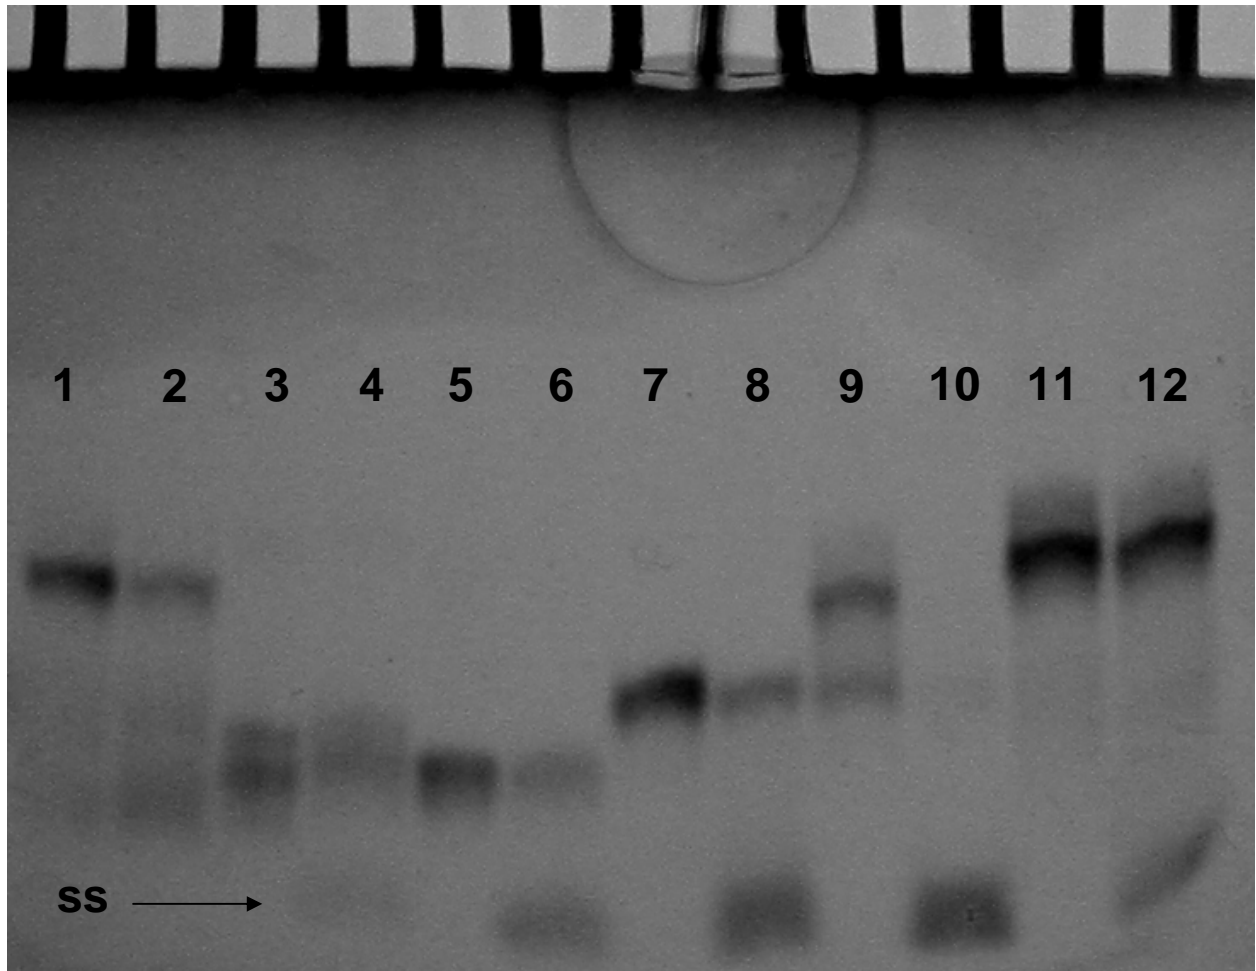

**Fig. S1.** Lane 1: native [d(TGGGGT)]<sub>4</sub>; lane 2: denatured [d(TGGGGT)]<sub>4</sub>; lane 3: native **AQ1**; lane 4: denatured **AQ1**; lane 5: native **AQ2**; lane 6: denatured **AQ2**; lane 7: native **AQ3**; lane 8: denatured **AQ3**; lane 9: native **AQ4**; lane 10: denatured **AQ4**; lane 11: native **AQ5**; lane 12: denatured **AQ5**. For all ODNs, except **AQ4**, only a partial denaturation occur. The black arrow indicates the slight band of **AQ1** as single strand.

## CD spectroscopy, kinetic and thermal analyses

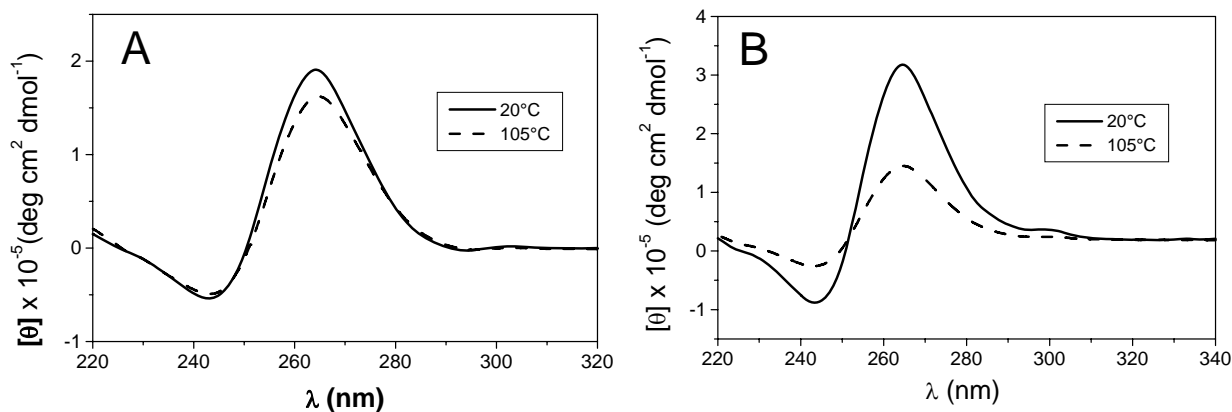

**Figure S2.** CD spectra of the quadruplex structures obtained from the sequences **AQ1** (A) and **AQ5** (B). The spectra have been reported at 20°C (solid line) and at higher temperatures (dashed line). The characteristic signals of the parallel quadruplex structures are still conserved at a high temperature suggesting the great thermal stability of the structures.

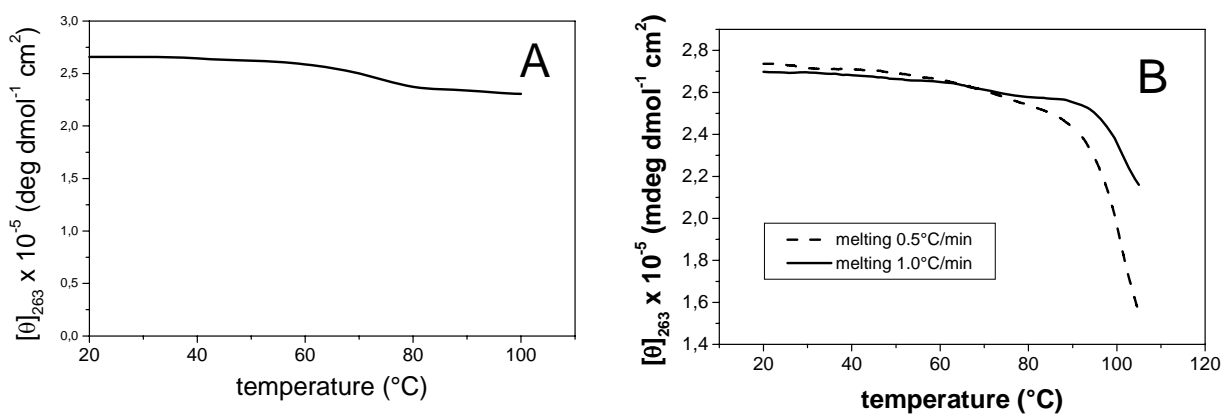

**Figure S3:** Thermal analysis of the quadruplex structure formed by **AQ1** (A) and **AQ5** (B). The panels report the melting curves obtained at a heating rate of 1°C/min (solid line) and 0.5°C/min (dashed line, recorded only for AQ5) following the CD signal at 263 nm. In both cases the melting process does not terminate suggesting the high thermal stability of the resulting quadruplex structures.

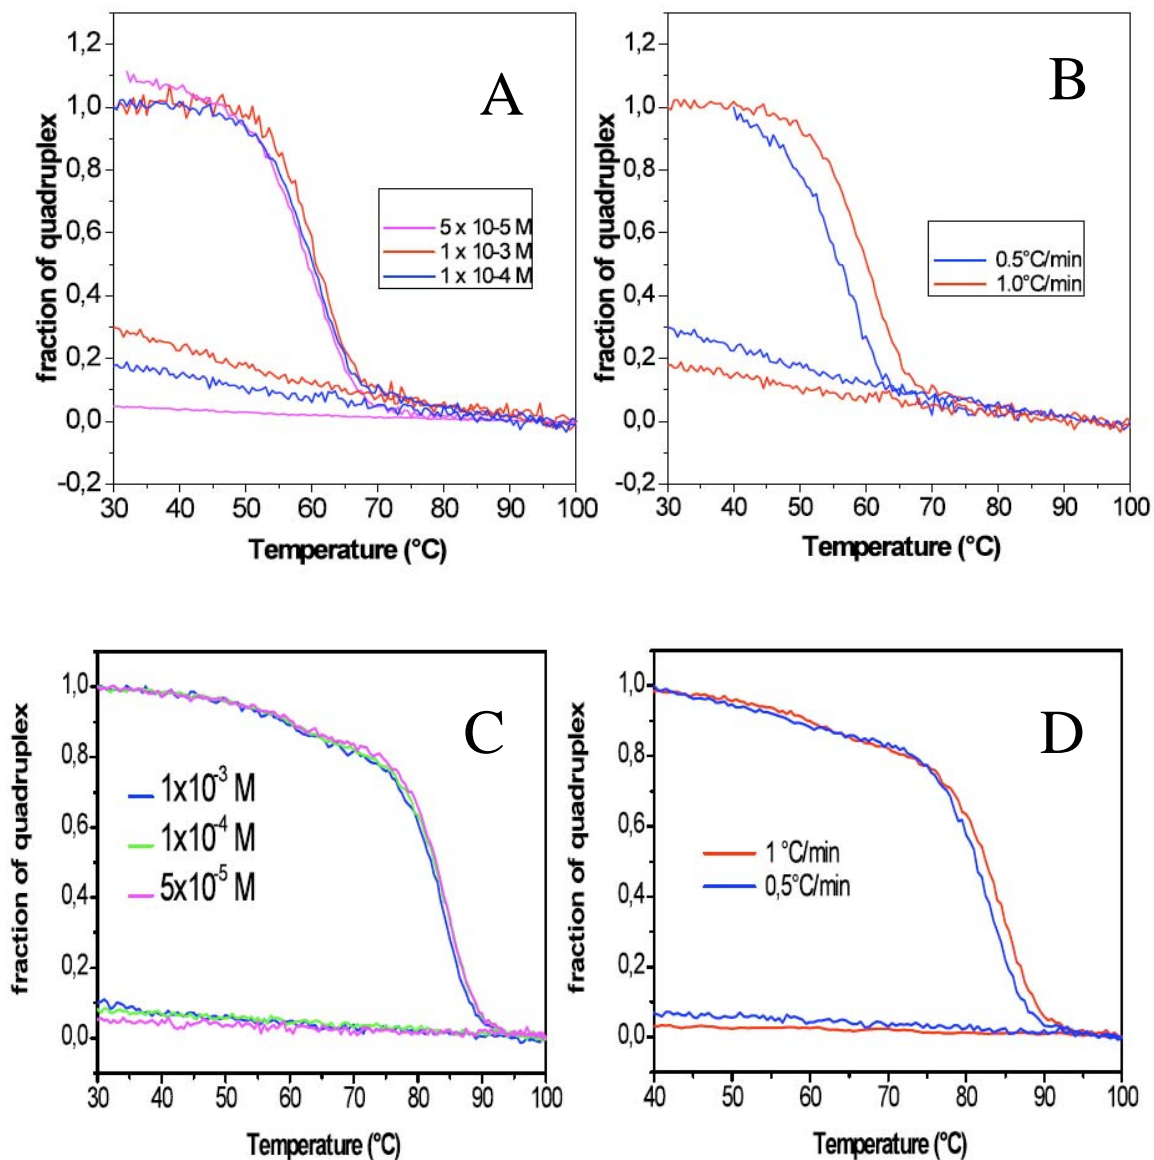

**Figure S4:** Thermal analysis carried out on the quadruplex structures obtained from the sequences **AQ2** (panel A and B) and **AQ4** (panel C and D). Melting/annealing curves were recorded at different quadruplex concentrations (panel A and C) and at different heating/cooling rates (panel B and D) for both systems. For panel B and D the quadruplex concentration is  $5 \times 10^{-5}$ .
